# Supplementary material for: Microbiota Transfer Therapy alters gut ecosystem and improves gastrointestinal and autism symptoms: an open-label study
Source: PubMed Central journal article supplement (PMC5264285; doi:10.1186/s40168-016-0225-7), 2017-01-23
Supplement: 40168_2016_225_MOESM1_ESM.pdf [file 40168_2016_225_MOESM1_ESM.pdf]

**Additional file 1: Table S1. Characteristics of study participants and their medical and diet history.** All values are median  $\pm$  median absolute deviation (MAD). p-values are either by Mann-Whitney U-test<sup>a</sup> or Fisher Exact Probability test<sup>b</sup>. n.s.: not-significant

|                                                                               | Children with ASD   | Neurotypical children | P-value (two-tailed)  |
|-------------------------------------------------------------------------------|---------------------|-----------------------|-----------------------|
| Total number                                                                  | 18                  | 20                    |                       |
| Male/Female                                                                   | 16/2                | 18/2                  |                       |
| Age                                                                           | 10.8 $\pm$ 1.6      | 11.4 $\pm$ 2.5        | n.s. <sup>a</sup>     |
| Body mass index (BMI)                                                         | 18.2 $\pm$ 2.2      | 17.1 $\pm$ 1.1        | n.s. <sup>a</sup>     |
| GSRs 4-point scale (sum of all 15 items, minimum score for no symptoms is 15) | 28.0 $\pm$ 3.3      | 18.8 $\pm$ 3.0        | P<0.001 <sup>a</sup>  |
| Born by C-Section <sup>1</sup>                                                | 61%                 | 15%                   | P<0.01 <sup>b</sup>   |
| Number of months of breastfeeding exclusively (no formula)                    | 3.0 $\pm$ 2.8       | 8.8 $\pm$ 6.7         | P<0.05 <sup>a</sup>   |
| % using non-standard formula (soy or other) <sup>2</sup>                      | 39%                 | 5%                    | P<0.05 <sup>b</sup>   |
| Food allergy (moderate or severe)                                             | 56%                 | 5%                    | P<0.001 <sup>b</sup>  |
| Other allergies (moderate or severe)                                          | 44%                 | 10%                   | P=0.25 <sup>b</sup>   |
| Eczema                                                                        | 56%                 | 5%                    | P<0.001 <sup>b</sup>  |
| Fiber consumption (grams) - child                                             | 9.4 $\pm$ 4.2       | 11.0 $\pm$ 2.5        | P=0.15 <sup>a,c</sup> |
| Fiber consumption (grams) - mother <sup>3</sup>                               | 6.2 $\pm$ 1.3       | 8.6 $\pm$ 1.3         | P<0.01 <sup>a</sup>   |
| Carbohydrate consumption (grams) - child                                      | 108.9 $\pm$ 37.8    | 126.3 $\pm$ 30.9      | P=0.51 <sup>a</sup>   |
| Fat consumption (grams) - child                                               | 48.5 $\pm$ 10.6     | 45.0 $\pm$ 11.8       | P=0.45 <sup>a</sup>   |
| Protein consumption (grams) - child                                           | 52.4 $\pm$ 17.5     | 47.9 $\pm$ 7.9        | P=0.75 <sup>a</sup>   |
| Total calorie consumption (kcal) - child                                      | 1,135.3 $\pm$ 316.4 | 1,014.9 $\pm$ 160.9   | P=0.89 <sup>a</sup>   |
| Oral antibiotic use during first 4 years of life (number of rounds)           | 2.5 $\pm$ 3.6       | 1.0 $\pm$ 3.7         | n.s. <sup>a</sup>     |

<sup>a</sup> P values are from two-tailed Mann-Whitney U-test.

<sup>b</sup>The binary dataset was tested by two-tailed Fisher Exact Probability test.

<sup>c</sup>One-tailed Mann-Whitney U-test P value was 0.07.

<sup>1</sup>1 mother of neurotypical children did not report the information.

<sup>2</sup>Mothers of 7 neurotypical children did not use any formula.

<sup>3</sup>Mother with **Children with ASD** (n=12); mothers with neurotypical children (n=13)

**Additional file 1: Table S2.** Percent days of no stool, stool hardness and softness based on the daily stool record (DSR) and the Bristol Stool Form Scale (P-values by two-tailed Wilcoxon signed-rank test)

|                                                                 |              |                  |                               | P-value<br>(Baseline vs.) |                               |
|-----------------------------------------------------------------|--------------|------------------|-------------------------------|---------------------------|-------------------------------|
|                                                                 | Base<br>line | Treatment<br>end | 8 weeks<br>after<br>treatment | Treatment<br>end          | 8 weeks<br>after<br>treatment |
| No stool                                                        | 33%          | 26%              | 26%                           | 0.29                      | 0.29                          |
| Hard stool (type 1 or 2)                                        | 19%          | 6%               | 3%                            | 0.07                      | 0.002                         |
| Soft/liquid stool (type 6 or 7)                                 | 10%          | 2%               | 3%                            | 0.03                      | 0.09                          |
| Abnormal stool (in total of<br>hard, soft/liquid/ and no stool) | 62%          | 34%              | 32%                           | 0.002                     | 0.002                         |

**Additional file 1: Table S3.** Adverse effects.

| <b>Adverse effect</b> | <b>% adverse effects</b>                        |
|-----------------------|-------------------------------------------------|
| Rash                  | 5% (due to natural orange flavor in vancomycin) |
| Hyperactivity         | 39%* (temporary: start of vancomycin only)      |
| Tantrums/aggression   | 28%* (temporary: start of vancomycin only)      |
| Nausea/vomiting       | 5% (due to high-dose SHGM)                      |

\* The severity of symptoms ranged from mild to moderate.
