# Supplementary material for: Microbiota Transfer Therapy alters gut ecosystem and improves gastrointestinal and autism symptoms: an open-label study
Source: Microbiome. 2017 Jan 23;5:10. doi: 10.1186/s40168-016-0225-7 (PMC5264285; doi:10.1186/s40168-016-0225-7)
Supplement: Additional file 5: Dataset S2. — Taxonomy changes in genus level after MTT. (XLSX 32 kb) [file 40168_2016_225_MOESM5_ESM.xlsx]

## Sheet: taxonomy-change
Taxonomy	Fold donor enrichment	Fold final enrichment	Donor median abundance	Neurotypical median abundance	Initial ASD median abundance	Final ASD median abundance	Wilcoxon	p-value	FDR-corrected p-value (q)
k__Bacteria;p__Proteobacteria;c__Betaproteobacteria;o__Burkholderiales;f__Oxalobacteraceae	inf	inf	2.10287e-05	0	0	0.000142986	0	6.31779e-05	0.00273954
k__Bacteria;p__Proteobacteria;c__Betaproteobacteria;o__Burkholderiales;f__Oxalobacteraceae;g__Oxalobacter	inf	inf	0	0	0	0.000116622	0	7.89725e-05	0.00273954
k__Bacteria;p__Bacteroidetes;c__Bacteroidia;o__Bacteroidales;f__S24-7;g__	inf	inf	0.00303509	0	0	0.000957645	3	8.72464e-05	0.00273954
k__Bacteria;p__Bacteroidetes;c__Bacteroidia;o__Bacteroidales;f__S24-7	inf	inf	0.00303509	0	0	0.000957645	3	8.72464e-05	0.00273954
k__Bacteria;p__Firmicutes;c__Clostridia;o__Clostridiales;f__Ruminococcaceae;g__Gemmiger	2.00182	6.14844	0.0059648	0.00759536	0.00297969	0.0183204	5	6.48219e-05	0.00273954
k__Bacteria;p__Proteobacteria;c__Betaproteobacteria;o__Burkholderiales;f__Comamonadaceae	inf	inf	0.000505136	0	0	5.83922e-05	13	0.000321215	0.00840514
k__Bacteria;p__Proteobacteria;c__Deltaproteobacteria;o__Desulfovibrionales;f__Desulfovibrionaceae;g__Desulfovibrio	26.5406	147.604	0.00118031	3.36496e-05	4.44719e-05	0.00656423	14	0.000525833	0.0117937
k__Bacteria;p__Firmicutes;c__Clostridia;o__Clostridiales;f__Ruminococcaceae;g__Anaerofilum	inf	inf	0	0	0	4.70802e-05	19	0.00238415	0.0224961
k__Bacteria;p__Proteobacteria;c__Betaproteobacteria;o__Burkholderiales;Other;Other	inf	inf	0.00065189	0	0	5.61695e-05	20	0.0011532	0.0201169
k__Bacteria;p__Proteobacteria;c__Betaproteobacteria;o__Burkholderiales;Other	inf	inf	0.00065189	0	0	5.61695e-05	20	0.0011532	0.0201169
k__Bacteria;p__Firmicutes;c__Clostridia;o__Clostridiales;f__Ruminococcaceae;g__Subdoligranulum	inf	inf	0	4.20999e-05	0	5.5787e-05	22	0.00296622	0.0224961
k__Bacteria;p__Proteobacteria;c__Alphaproteobacteria;o__RF32	inf	inf	0.00035831	0	0	0.00130496	23	0.0029548	0.0224961
k__Bacteria;p__Proteobacteria;c__Alphaproteobacteria;o__RF32;f__;g__	inf	inf	0.00035831	0	0	0.00130496	23	0.0029548	0.0224961
k__Bacteria;p__Proteobacteria;c__Alphaproteobacteria;o__RF32;f__	inf	inf	0.00035831	0	0	0.00130496	23	0.0029548	0.0224961
k__Bacteria;p__Lentisphaerae;c__[Lentisphaeria];o__Victivallales	inf	inf	0	0	0	3.00066e-05	24	0.00227531	0.0224961
k__Bacteria;p__Lentisphaerae;c__[Lentisphaeria]	inf	inf	0	0	0	3.00066e-05	24	0.00227531	0.0224961
k__Bacteria;p__Lentisphaerae	inf	inf	0	0	0	3.00066e-05	24	0.00227531	0.0224961
k__Bacteria;p__Lentisphaerae;c__[Lentisphaeria];o__Victivallales;f__Victivallaceae	inf	inf	0	0	0	3.00066e-05	24	0.00227531	0.0224961
k__Bacteria;p__Actinobacteria;c__Coriobacteriia;o__Coriobacteriales;f__Coriobacteriaceae;g__Adlercreutzia	0	4.08175	0	5.22821e-05	4.88506e-05	0.000199396	26	0.00315232	0.0224961
k__Bacteria;p__Proteobacteria;c__Deltaproteobacteria;o__Desulfovibrionales;f__Desulfovibrionaceae	1.3136	3.843	0.00278974	0.00146184	0.00212373	0.0081615	26	0.00315232	0.0224961
k__Bacteria;p__Proteobacteria;c__Deltaproteobacteria;o__Desulfovibrionales	1.3136	3.843	0.00278974	0.00146184	0.00212373	0.0081615	26	0.00315232	0.0224961
k__Bacteria;p__Proteobacteria;c__Deltaproteobacteria	1.3136	3.843	0.00278974	0.00146184	0.00212373	0.0081615	26	0.00315232	0.0224961
k__Bacteria;p__Bacteroidetes;c__Bacteroidia;o__Bacteroidales;f__[Odoribacteraceae];g__Butyricimonas	inf	inf	0.000105144	0	0	0.00454143	28	0.00432762	0.0295407
k__Bacteria;p__Firmicutes;c__Clostridia;o__Clostridiales;f__Lachnospiraceae;g__Ruminococcus	0	0	0	9.71723e-05	0.000225701	0	28	0.00624543	0.0392213
k__Bacteria;p__Firmicutes;c__Clostridia;o__Clostridiales;f__Peptostreptococcaceae;g__	6.82723	2.41922	0.00700098	0.00218142	0.00102545	0.00248079	29	0.0050533	0.033057
k__Bacteria;p__Proteobacteria;c__Alphaproteobacteria	inf	inf	0.000505306	3.41169e-05	0	0.00132958	30	0.00830302	0.0449509
k__Bacteria;p__Firmicutes;c__Clostridia;o__Clostridiales;f__Veillonellaceae;g__Veillonella	0.522844	0	4.59369e-05	4.54463e-05	8.78596e-05	0	30	0.0112384	0.0534674
k__Bacteria;p__Actinobacteria	2.88573	3.02815	0.0106861	0.00745319	0.00370307	0.0112134	31	0.00684334	0.0413232
k__Bacteria;p__Firmicutes;c__Clostridia;o__Clostridiales;f__	5.71349	6.36918	0.0187778	0.0159062	0.00328658	0.0209328	32	0.00793668	0.0445021
k__Bacteria;p__Firmicutes;c__Clostridia;o__Clostridiales;f__;g__	5.71349	6.36918	0.0187778	0.0159062	0.00328658	0.0209328	32	0.00793668	0.0445021
k__Bacteria;p__Actinobacteria;c__Actinobacteria;o__Bifidobacteriales	3.80768	3.67301	0.0102645	0.00722596	0.00269574	0.00990148	32	0.0109473	0.0534674
k__Bacteria;p__Actinobacteria;c__Actinobacteria;o__Bifidobacteriales;f__Bifidobacteriaceae	3.80768	3.67301	0.0102645	0.00722596	0.00269574	0.00990148	32	0.0109473	0.0534674
k__Bacteria;p__Actinobacteria;c__Actinobacteria;o__Bifidobacteriales;f__Bifidobacteriaceae;g__Bifidobacterium	3.80768	3.66467	0.0102645	0.00722596	0.00269574	0.00987902	32	0.0109473	0.0534674
k__Bacteria;p__Actinobacteria;c__Actinobacteria	3.74267	3.62652	0.0102645	0.00727141	0.00274257	0.00994597	35	0.0122145	0.0564021
k__Bacteria;p__Actinobacteria;c__Coriobacteriia;o__Coriobacteriales;f__Coriobacteriaceae;g__Eggerthella	0	0.585845	0	0	9.42348e-05	5.52069e-05	36	0.0222898	0.0752325
k__Bacteria;p__Bacteroidetes	0.344496	0.826139	0.210193	0.404768	0.610147	0.504066	37	0.0160998	0.0683156
k__Bacteria;p__Bacteroidetes;c__Bacteroidia	0.344418	0.825843	0.210112	0.404637	0.610048	0.503803	37	0.0160998	0.0683156
k__Bacteria;p__Bacteroidetes;c__Bacteroidia;o__Bacteroidales	0.344418	0.825843	0.210112	0.404637	0.610048	0.503803	37	0.0160998	0.0683156
k__Bacteria;p__Firmicutes;Other;Other;Other;Other	1.03418	2.13256	0.000147539	0.0002105	0.000142663	0.000304236	38	0.0184221	0.0688637
k__Bacteria;p__Firmicutes;Other;Other	1.03418	2.13256	0.000147539	0.0002105	0.000142663	0.000304236	38	0.0184221	0.0688637
k__Bacteria;p__Firmicutes;Other;Other;Other	1.03418	2.13256	0.000147539	0.0002105	0.000142663	0.000304236	38	0.0184221	0.0688637
k__Bacteria;p__Firmicutes;Other	1.03418	2.13256	0.000147539	0.0002105	0.000142663	0.000304236	38	0.0184221	0.0688637
k__Bacteria;p__Firmicutes;c__Clostridia;o__Clostridiales;f__Ruminococcaceae;Other	1.74731	2.01662	0.00787874	0.00888796	0.00450907	0.00909306	38	0.0184221	0.0688637
k__Bacteria;p__Firmicutes;c__Clostridia;o__Clostridiales;f__Ruminococcaceae;g__Anaerotruncus	0.247844	0.709405	1.63143e-05	3.36496e-05	6.58247e-05	4.66964e-05	39	0.0270035	0.0831285
k__Bacteria;p__Bacteroidetes;c__Bacteroidia;o__Bacteroidales;f__Bacteroidaceae	0.268505	0.630392	0.127007	0.248715	0.473014	0.298184	39	0.0210325	0.0750477
k__Bacteria;p__Bacteroidetes;c__Bacteroidia;o__Bacteroidales;f__Bacteroidaceae;g__Bacteroides	0.268505	0.63034	0.127007	0.248715	0.473014	0.29816	39	0.0210325	0.0750477
k__Bacteria;p__Bacteroidetes;c__Bacteroidia;o__Bacteroidales;f__Prevotellaceae	17.6572	248.122	0.000948467	0.000221251	5.37156e-05	0.013328	40	0.0239594	0.0752325
k__Bacteria;p__Bacteroidetes;c__Bacteroidia;o__Bacteroidales;f__Prevotellaceae;g__Prevotella	17.6572	247.992	0.000948467	0.000221251	5.37156e-05	0.0133211	40	0.0239594	0.0752325
k__Bacteria;p__Proteobacteria	2.19223	2.27205	0.0382513	0.0149657	0.0174485	0.0396439	40	0.0239594	0.0752325
k__Bacteria;p__Bacteroidetes;c__Bacteroidia;o__Bacteroidales;f__Porphyromonadaceae;g__Parabacteroides	0.43353	2.06286	0.0097688	0.0263763	0.0225332	0.0464829	40	0.0239594	0.0752325
k__Bacteria;p__Bacteroidetes;c__Bacteroidia;o__Bacteroidales;f__Porphyromonadaceae	0.41163	1.95924	0.0097688	0.0263763	0.023732	0.0464966	40	0.0239594	0.0752325
k__Bacteria;p__Firmicutes;c__Clostridia;Other;Other;Other	inf	inf	0	0	0	3.28065e-05	41	0.0449965	0.108684
k__Bacteria;p__Firmicutes;c__Clostridia;Other	inf	inf	0	0	0	3.28065e-05	41	0.0449965	0.108684
k__Bacteria;p__Firmicutes;c__Clostridia;Other;Other	inf	inf	0	0	0	3.28065e-05	41	0.0449965	0.108684
k__Bacteria;p__Actinobacteria;c__Coriobacteriia;o__Coriobacteriales;f__Coriobacteriaceae;g__Collinsella	0.426757	7.36273	3.26286e-05	0	7.6457e-05	0.000562932	41	0.0399229	0.102752
k__Bacteria;p__Actinobacteria;c__Coriobacteriia;o__Coriobacteriales;f__Coriobacteriaceae	0.517162	1.87949	0.0003426	0.000522821	0.000662462	0.00124509	42	0.0308861	0.0897986
k__Bacteria;p__Actinobacteria;c__Coriobacteriia	0.517162	1.87949	0.0003426	0.000522821	0.000662462	0.00124509	42	0.0308861	0.0897986
k__Bacteria;p__Actinobacteria;c__Coriobacteriia;o__Coriobacteriales	0.517162	1.87949	0.0003426	0.000522821	0.000662462	0.00124509	42	0.0308861	0.0897986
k__Bacteria;p__Firmicutes;c__Clostridia;o__Clostridiales;f__Lachnospiraceae;Other	3.01755	0.696152	0.0361688	0.0135598	0.0119861	0.00834417	43	0.0349519	0.0997719
k__Bacteria;Other;Other;Other	1.301	1.57003	0.000513831	0.000716455	0.00039495	0.000620082	44	0.0394661	0.102752
k__Bacteria;Other;Other;Other;Other;Other	1.301	1.57003	0.000513831	0.000716455	0.00039495	0.000620082	44	0.0394661	0.102752
k__Bacteria;Other;Other	1.301	1.57003	0.000513831	0.000716455	0.00039495	0.000620082	44	0.0394661	0.102752
k__Bacteria;Other;Other;Other;Other	1.301	1.57003	0.000513831	0.000716455	0.00039495	0.000620082	44	0.0394661	0.102752
k__Bacteria;Other	1.301	1.57003	0.000513831	0.000716455	0.00039495	0.000620082	44	0.0394661	0.102752
k__Bacteria;p__Firmicutes;c__Clostridia;o__Clostridiales;f__Lachnospiraceae;g__Pseudobutyrivibrio	2.68398	0	0.000126462	0	4.71174e-05	0	44	0.0600668	0.136674
k__Bacteria;p__Bacteroidetes;c__Bacteroidia;o__Bacteroidales;f__Rikenellaceae;g__Alistipes	0.0580115	0.51487	0.00200803	0.0157443	0.0346144	0.0178219	45	0.0444659	0.108684
k__Bacteria;p__Firmicutes;c__Clostridia;o__Clostridiales;f__Lachnospiraceae;g__Anaerostipes	1.27674	1.97441	0.000542711	0.000836392	0.000425077	0.000839275	46	0.0499899	0.117141
k__Bacteria;p__Firmicutes;c__Clostridia;o__Clostridiales;f__Ruminococcaceae;g__Oscillospira	0.524902	1.41782	0.0110007	0.0203116	0.0209577	0.0297143	46	0.0499899	0.117141
k__Bacteria;p__Firmicutes;c__Clostridia;o__Clostridiales;f__Ruminococcaceae;g__Butyricicoccus	5.45513	2.09474	0.00233955	0.000637078	0.000428872	0.000898376	47	0.056078	0.129474
k__Bacteria;p__Actinobacteria;c__Actinobacteria;o__Actinomycetales;f__Actinomycetaceae;g__Actinomyces	0	0	0	0	3.14707e-05	0	47	0.0754814	0.164591
k__Bacteria;p__Bacteroidetes;c__Bacteroidia;o__Bacteroidales;f__Rikenellaceae;g__	0.120111	2.20764	0.000967321	0.00971493	0.00805358	0.0177794	48	0.0627714	0.138804
k__Bacteria;p__Firmicutes;c__Bacilli;o__Lactobacillales	0.769967	0.649685	0.00048844	0.000793279	0.000634366	0.000412138	48	0.0627714	0.138804
k__Bacteria;p__Proteobacteria;c__Gammaproteobacteria;o__Enterobacteriales;f__Enterobacteriaceae;g__Klebsiella	0	0	0	0	9.55712e-06	0	48	0.0867177	0.181926
k__Bacteria;p__Firmicutes;c__Clostridia;o__Clostridiales;f__[Tissierellaceae]	0.99446	1.59914	3.26286e-05	1.87547e-05	3.28103e-05	5.24684e-05	49	0.0767289	0.16502
k__Bacteria;p__Firmicutes;c__Clostridia;o__Clostridiales;f__Ruminococcaceae	1.4537	1.11088	0.230557	0.230538	0.1586	0.176185	51	0.0869072	0.181926
k__Bacteria;p__Bacteroidetes;c__Bacteroidia;o__Bacteroidales;f__[Odoribacteraceae]	0.831156	4.79676	0.00117761	0.00190874	0.00141683	0.0067962	52	0.0964484	0.199242
k__Bacteria;p__Firmicutes;c__Bacilli;o__Lactobacillales;f__Streptococcaceae	0.699564	0.706906	0.000407857	0.000242931	0.000583016	0.000412138	53	0.10681	0.217781
k__Bacteria;p__Proteobacteria;c__Gammaproteobacteria;o__Enterobacteriales;f__Enterobacteriaceae;g__Shigella	1.19384	0	4.59369e-05	0	3.84783e-05	0	53	0.140879	0.276475
k__Bacteria;p__Firmicutes;c__Clostridia;o__Clostridiales;f__Lachnospiraceae;g__Lachnospira	5.11664	1.44015	0.0216817	0.00521569	0.00423748	0.00610262	54	0.118034	0.234574
k__Bacteria;p__Firmicutes;c__Clostridia;o__Clostridiales;f__Lachnospiraceae;g__Clostridium	2.20198	0.70752	0.019788	0.0122437	0.00898646	0.0063581	54	0.118034	0.234574
k__Bacteria;p__Firmicutes;c__Clostridia;o__Clostridiales;f__Veillonellaceae;g__Phascolarctobacterium	3.52355	3.42241	0.00370956	0.00163607	0.00105279	0.00360308	57	0.157299	0.297542
k__Bacteria;p__Firmicutes;c__Bacilli;o__Lactobacillales;f__Streptococcaceae;g__Streptococcus	0.590616	0.722104	0.000336757	0.000242931	0.000570179	0.000411728	57	0.157299	0.297542
k__Bacteria;p__Proteobacteria;c__Gammaproteobacteria;o__Pasteurellales;f__Pasteurellaceae;g__Haemophilus	6.81763	0.337394	0.000954145	6.29327e-05	0.000139953	4.72192e-05	57	0.157299	0.297542
k__Bacteria;p__Firmicutes;c__Clostridia;o__Clostridiales;f__Peptostreptococcaceae	3.35726	1.59433	0.012808	0.00340103	0.00381501	0.00608241	58	0.172381	0.314696
k__Bacteria;p__Proteobacteria;c__Gammaproteobacteria;o__Pasteurellales	7.00623	0.43012	0.00107048	0.00010618	0.00015279	6.5718e-05	58	0.172381	0.314696
k__Bacteria;p__Proteobacteria;c__Gammaproteobacteria;o__Pasteurellales;f__Pasteurellaceae	7.00623	0.43012	0.00107048	0.00010618	0.00015279	6.5718e-05	58	0.172381	0.314696
k__Bacteria;p__Firmicutes;c__Bacilli	1.46704	0.940659	0.00162713	0.00151038	0.00110912	0.00104331	59	0.18852	0.340202
k__Bacteria;p__Firmicutes;c__Clostridia;o__Clostridiales;f__Lachnospiraceae	1.81311	0.790901	0.282307	0.17802	0.155704	0.123146	60	0.205746	0.36707
k__Bacteria;p__Bacteroidetes;Other;Other;Other;Other	0.516176	1.20185	8.15714e-05	7.56125e-05	0.00015803	0.000189929	61	0.234804	0.392172
k__Bacteria;p__Bacteroidetes;Other;Other	0.516176	1.20185	8.15714e-05	7.56125e-05	0.00015803	0.000189929	61	0.234804	0.392172
k__Bacteria;p__Bacteroidetes;Other	0.516176	1.20185	8.15714e-05	7.56125e-05	0.00015803	0.000189929	61	0.234804	0.392172
k__Bacteria;p__Bacteroidetes;Other;Other;Other	0.516176	1.20185	8.15714e-05	7.56125e-05	0.00015803	0.000189929	61	0.234804	0.392172
k__Bacteria;p__Firmicutes;c__Clostridia;o__Clostridiales;Other	0.981525	0.90949	0.00248059	0.00348837	0.00252728	0.00229854	61	0.224089	0.39091
k__Bacteria;p__Firmicutes;c__Clostridia;o__Clostridiales;Other;Other	0.981525	0.90949	0.00248059	0.00348837	0.00252728	0.00229854	61	0.224089	0.39091
k__Bacteria;p__Firmicutes;c__Clostridia;o__Clostridiales;f__Lachnospiraceae;g__Coprococcus	1.85068	0.812111	0.0353883	0.020691	0.0191218	0.015529	63	0.264215	0.432117
k__Bacteria;p__Verrucomicrobia;c__Verrucomicrobiae;o__Verrucomicrobiales;f__Verrucomicrobiaceae;g__Akkermansia	0.257962	0.728898	0.000551243	0.00447374	0.00213692	0.0015576	63	0.275234	0.432117
k__Bacteria;p__Verrucomicrobia;c__Verrucomicrobiae;o__Verrucomicrobiales	0.254059	0.717871	0.000551243	0.00447374	0.00216974	0.0015576	63	0.275234	0.432117
k__Bacteria;p__Verrucomicrobia;c__Verrucomicrobiae;o__Verrucomicrobiales;f__Verrucomicrobiaceae	0.254059	0.717871	0.000551243	0.00447374	0.00216974	0.0015576	63	0.275234	0.432117
k__Bacteria;p__Verrucomicrobia	0.254059	0.717871	0.000551243	0.00447374	0.00216974	0.0015576	63	0.275234	0.432117
k__Bacteria;p__Verrucomicrobia;c__Verrucomicrobiae	0.254059	0.717871	0.000551243	0.00447374	0.00216974	0.0015576	63	0.275234	0.432117
k__Bacteria;p__Tenericutes	inf	inf	0.000880971	0.000499909	0	0.000126247	64	0.329991	0.498159
k__Bacteria;p__Firmicutes;c__Clostridia	1.62509	1.14251	0.515044	0.496217	0.316933	0.3621	64	0.286034	0.435993
k__Bacteria;p__Firmicutes;c__Clostridia;o__Clostridiales	1.62509	1.14251	0.515044	0.495924	0.316933	0.3621	64	0.286034	0.435993
k__Bacteria;p__Firmicutes;c__Erysipelotrichi;o__Erysipelotrichales;f__Erysipelotrichaceae;g__	1.26923	0.43814	0.0056043	0.00530898	0.00441552	0.00193462	64	0.286034	0.435993
k__Bacteria;p__Actinobacteria;c__Coriobacteriia;o__Coriobacteriales;f__Coriobacteriaceae;g__	1.24379	1.28837	0.000105144	9.08926e-05	8.45348e-05	0.000108913	66	0.344347	0.514881
k__Bacteria;p__Firmicutes	1.60196	1.1679	0.521797	0.523011	0.325725	0.380413	67	0.35862	0.531163
k__Bacteria;p__Proteobacteria;c__Betaproteobacteria	3.26531	1.56177	0.0238536	0.0083766	0.00730516	0.011409	68	0.385188	0.544816
k__Bacteria;p__Proteobacteria;c__Betaproteobacteria;o__Burkholderiales	3.26531	1.55754	0.0238536	0.0083766	0.00730516	0.0113781	68	0.385188	0.544816
k__Bacteria;p__Firmicutes;c__Clostridia;o__Clostridiales;f__Lachnospiraceae;g__Lachnobacterium	9.07268	0.974782	0.0007994	9.08926e-05	8.81107e-05	8.58887e-05	68	0.412878	0.563734
k__Bacteria;p__Firmicutes;c__Erysipelotrichi;o__Erysipelotrichales	0.908561	0.469732	0.00620148	0.00773602	0.0068256	0.0032062	68	0.385188	0.544816
k__Bacteria;p__Firmicutes;c__Erysipelotrichi	0.908561	0.469732	0.00620148	0.00773602	0.0068256	0.0032062	68	0.385188	0.544816
k__Bacteria;p__Firmicutes;c__Erysipelotrichi;o__Erysipelotrichales;f__Erysipelotrichaceae	0.908561	0.469732	0.00620148	0.00773602	0.0068256	0.0032062	68	0.385188	0.544816
k__Bacteria;p__Proteobacteria;c__Betaproteobacteria;o__Burkholderiales;f__Alcaligenaceae	3.14821	1.47259	0.0222821	0.0083766	0.0070777	0.0104226	69	0.412926	0.563734
k__Bacteria;p__Proteobacteria;c__Betaproteobacteria;o__Burkholderiales;f__Alcaligenaceae;g__Sutterella	3.14028	1.46483	0.022226	0.0083766	0.0070777	0.0103676	69	0.412926	0.563734
k__Bacteria;p__Firmicutes;c__Clostridia;o__Clostridiales;f__Lachnospiraceae;g__Blautia	1.30639	1.02919	0.0256487	0.0212605	0.0196333	0.0202065	69	0.412926	0.563734
k__Bacteria;p__Firmicutes;c__Erysipelotrichi;o__Erysipelotrichales;f__Erysipelotrichaceae;g__Coprobacillus	0	0	0	6.29327e-05	4.53004e-05	0	69	0.454707	0.585156
k__Bacteria;p__Bacteroidetes;c__Bacteroidia;o__Bacteroidales;Other	0.536601	1.74319	0.0001142	0.000221251	0.000212821	0.000370987	70	0.441814	0.573263
k__Bacteria;p__Bacteroidetes;c__Bacteroidia;o__Bacteroidales;Other;Other	0.536601	1.74319	0.0001142	0.000221251	0.000212821	0.000370987	70	0.441814	0.573263
k__Bacteria;p__Actinobacteria;c__Actinobacteria;o__Actinomycetales	0	1.21833	0	3.75094e-05	4.61036e-05	5.61695e-05	70	0.441814	0.573263
k__Bacteria;p__Proteobacteria;c__Deltaproteobacteria;o__Desulfovibrionales;f__Desulfovibrionaceae;g__Bilophila	0.869794	1.17481	0.00103115	0.000932554	0.00118551	0.00139275	70	0.441814	0.573263
k__Bacteria;p__Firmicutes;c__Clostridia;o__Clostridiales;f__Peptostreptococcaceae;Other	2.08497	1.00721	0.00470018	0.00187547	0.00225432	0.00227057	70	0.441814	0.573263
k__Bacteria;p__Firmicutes;c__Clostridia;o__Clostridiales;f__Clostridiaceae;g__Clostridium	1.5184	0.797479	0.00566105	0.00328426	0.0037283	0.00297324	70	0.441814	0.573263
k__Bacteria;p__Firmicutes;c__Clostridia;o__Clostridiales;f__Lachnospiraceae;g__Dorea	1.08413	1.27278	0.00316964	0.00471519	0.00292367	0.00372118	71	0.471825	0.592613
k__Bacteria;p__Firmicutes;c__Clostridia;o__Clostridiales;f__Ruminococcaceae;g__Faecalibacterium	3.02248	1.27216	0.157955	0.07142	0.05226	0.0664829	71	0.471825	0.592613
k__Bacteria;p__Firmicutes;c__Clostridia;o__Clostridiales;f__Peptostreptococcaceae;g__Clostridium	1.04884	1.26735	0.000277343	0.000252042	0.000264428	0.000335121	71	0.471825	0.592613
k__Bacteria;p__Firmicutes;c__Erysipelotrichi;o__Erysipelotrichales;f__Erysipelotrichaceae;g__Clostridium	0.621776	0.823944	0.000309971	0.000388689	0.000498525	0.000410757	71	0.481964	0.600543
k__Bacteria;p__Firmicutes;c__Clostridia;o__Clostridiales;f__Clostridiaceae;g__	2.50435	13.1494	4.20575e-05	0.000971723	1.67937e-05	0.000220828	72	0.527599	0.642116
k__Bacteria;p__Firmicutes;c__Erysipelotrichi;o__Erysipelotrichales;f__Erysipelotrichaceae;g__Holdemania	2.30946	1.42802	0.000183748	9.29325e-05	7.9563e-05	0.000113618	72	0.512691	0.628847
k__Bacteria;p__Firmicutes;c__Clostridia;o__Clostridiales;f__Clostridiaceae	1.36214	0.610778	0.0086923	0.00603858	0.00638133	0.00389758	72	0.502928	0.621729
k__Bacteria;p__Firmicutes;c__Clostridia;o__Clostridiales;f__Ruminococcaceae;g__Clostridium	0	0.901571	0	6.29327e-05	8.78596e-05	7.92117e-05	73	0.552191	0.661786
k__Bacteria;p__Firmicutes;c__Erysipelotrichi;o__Erysipelotrichales;f__Erysipelotrichaceae;g__[Eubacterium]	0	0.41955	0	0.000212359	0.000157073	6.59002e-05	73	0.535081	0.646213
k__Bacteria;p__Firmicutes;c__Clostridia;o__Clostridiales;f__Lachnospiraceae;g__Roseburia	2.58339	0.71793	0.0741683	0.0428631	0.0287097	0.0206116	74	0.568239	0.675859
k__Bacteria;p__Actinobacteria;c__Actinobacteria;o__Actinomycetales;f__Actinomycetaceae	0	0.647293	0	0	3.47012e-05	2.24618e-05	74	0.590512	0.69707
k__Bacteria;p__Firmicutes;c__Clostridia;o__Clostridiales;f__Clostridiaceae;g__SMB53	3.29671	0.766586	0.000954145	0.000201633	0.000289424	0.000221868	75	0.602349	0.705737
k__Bacteria;p__Firmicutes;c__Clostridia;o__Clostridiales;f__Lachnospiraceae;g__[Ruminococcus]	1.00602	1.06275	0.00788281	0.00764103	0.00783568	0.00832738	76	0.637352	0.741217
k__Bacteria;p__Firmicutes;c__Clostridia;o__Clostridiales;f__Christensenellaceae;g__	0.536877	1.44373	0.000275621	0.00140627	0.000513379	0.000741182	78	0.709773	0.81937
k__Bacteria;p__Firmicutes;c__Clostridia;o__Clostridiales;f__Lachnospiraceae;g__	2.67091	0.683635	0.0332674	0.0147943	0.0124555	0.00851499	79	0.747044	0.855776
k__Bacteria;p__Proteobacteria;c__Gammaproteobacteria;o__Enterobacteriales;f__Enterobacteriaceae;g__Escherichia	1.02291	1.93081	0.000505136	0.000243811	0.000493824	0.000953478	80	0.784916	0.855776
k__Bacteria;p__Firmicutes;c__Clostridia;o__Clostridiales;f__[Mogibacteriaceae];g__	1.13736	1.74172	0.00055665	0.00143776	0.000489424	0.000852442	80	0.784916	0.855776
k__Bacteria;p__Firmicutes;c__Clostridia;o__Clostridiales;f__Christensenellaceae	0.536877	1.51826	0.000275621	0.00140627	0.000513379	0.00077944	80	0.784916	0.855776
k__Bacteria;p__Firmicutes;c__Clostridia;o__Clostridiales;f__Ruminococcaceae;g__Ruminococcus	1.47294	1.51485	0.028289	0.0437382	0.0192058	0.029094	80	0.784916	0.855776
k__Bacteria;p__Firmicutes;c__Bacilli;o__Turicibacterales;f__Turicibacteraceae;g__Turicibacter	1.21594	0.955712	0.000299735	0.000145758	0.000246505	0.000235588	80	0.784916	0.855776
k__Bacteria;p__Firmicutes;c__Bacilli;o__Turicibacterales;f__Turicibacteraceae	1.21594	0.955712	0.000299735	0.000145758	0.000246505	0.000235588	80	0.784916	0.855776
k__Bacteria;p__Firmicutes;c__Bacilli;o__Turicibacterales	1.21594	0.955712	0.000299735	0.000145758	0.000246505	0.000235588	80	0.784916	0.855776
k__Bacteria;p__Firmicutes;c__Clostridia;o__Clostridiales;f__Veillonellaceae;g__Dialister	87.4438	1.7082	0.0234436	0.00337408	0.000268099	0.000457967	82	0.862121	0.908409
k__Bacteria;p__Proteobacteria;c__Gammaproteobacteria;o__Enterobacteriales;f__Enterobacteriaceae	2.30203	1.66364	0.00168241	0.0003368	0.000730836	0.00121585	82	0.862121	0.908409
k__Bacteria;p__Proteobacteria;c__Gammaproteobacteria;o__Enterobacteriales	2.30203	1.66364	0.00168241	0.0003368	0.000730836	0.00121585	82	0.862121	0.908409
k__Bacteria;p__Proteobacteria;c__Gammaproteobacteria;o__Enterobacteriales;f__Enterobacteriaceae;Other	0.509841	1.39133	5.42711e-05	7.21163e-05	0.000106447	0.000148103	82	0.862121	0.908409
k__Bacteria;p__Bacteroidetes;c__Bacteroidia;o__Bacteroidales;f__Rikenellaceae;Other	0.147362	1.10951	0.00033646	0.00151618	0.00228322	0.00253325	82	0.862121	0.908409
k__Bacteria;p__Bacteroidetes;c__Bacteroidia;o__Bacteroidales;f__[Barnesiellaceae]	9.66792	25.2384	0.000379898	0.00758684	3.92947e-05	0.000991737	83	0.901273	0.924835
k__Bacteria;p__Bacteroidetes;c__Bacteroidia;o__Bacteroidales;f__[Barnesiellaceae];g__	9.66792	25.2384	0.000379898	0.00715331	3.92947e-05	0.000991737	83	0.901273	0.924835
k__Bacteria;p__Firmicutes;c__Clostridia;o__Clostridiales;f__[Mogibacteriaceae]	1.13736	1.74172	0.00055665	0.00143776	0.000489424	0.000852442	83	0.901273	0.924835
k__Bacteria;p__Firmicutes;c__Clostridia;o__Clostridiales;f__Veillonellaceae	4.80642	0.984254	0.0303376	0.00905059	0.00631189	0.0062125	83	0.901273	0.924835
k__Bacteria;p__Bacteroidetes;c__Bacteroidia;o__Bacteroidales;f__[Odoribacteraceae];g__Odoribacter	1.06825	1.74672	0.00107246	0.00105222	0.00100394	0.00175361	84	0.940666	0.952804
k__Bacteria;p__Bacteroidetes;c__Bacteroidia;o__Bacteroidales;f__Rikenellaceae	0.0605617	0.789582	0.00330151	0.0339775	0.0545148	0.0430439	84	0.940666	0.952804
k__Bacteria;p__Proteobacteria;c__Gammaproteobacteria	1.74551	1.30202	0.00222904	0.000759536	0.00127701	0.0016627	85	0.980206	0.980206
k__Bacteria;p__Firmicutes;c__Clostridia;o__Clostridiales;f__Ruminococcaceae;g__	0.708114	0.856367	0.0107033	0.0318578	0.0151152	0.0129442	85	0.980206	0.980206
